# Supplementary material for: Modulation of α-synuclein AGE-based cytotoxic aggregation by zinc oxide nanoparticles: a potential therapeutic approach
Source: Royal Society of Chemistry journal article supplement (doi:10.1039/d5nj03165f), 2025-01-01
Supplement: d5nj03165f1.pdf [file d5nj03165f1.pdf]

# Modulation of $\alpha$ -synuclein AGE-based cytotoxic aggregation by zinc oxide nanoparticles: a potential therapeutic approach

Sonali Mohanty<sup>1</sup>, Dibyam Debasish Sahu<sup>1,2</sup>, Suman Jha<sup>1\*</sup>

<sup>1</sup>Department of Life Science, National Institute of Technology, Rourkela, Odisha, 769008, India.

<sup>2</sup>Department of Biophysics, National Institute of Mental Health and Neurosciences, Bengaluru, Karnataka, 560029, India.

\*Corresponding author: Dr. Suman Jha, Department of Life Science, National Institute of Technology, Rourkela 769008, Odisha, India. E-mail address: [jhas@nitrkl.ac.in](mailto:jhas@nitrkl.ac.in), Tel.: +916612462687.

## Supporting Information Index

**Figure S1:** 10 % SDS-PAGE gel and HPLC chromatogram of purified  $\alpha$ S; **Figure S2:** Characterisation of ZnONP<sub>P</sub>, ZnONP<sub>Y</sub>, and ZnONP<sub>W</sub> using (a) UV-Visible spectrum, (b) X-Ray diffraction spectrum, (c) Raman spectrum, (d-f) representative TEM micrographs in 200 nm range with SAED pattern insets; **Table ST1:** Determination of zeta potential for synthesised ZnONPs by DLS Zeta; **Figure S3:** Representative bar graph for calculated free lysine percentage estimated by fluorescamine assay; **Table ST2:** Characterisation of fluorescence intensity at 490 nm and absorbance at 370 nm for mentioned samples; **Figure S4:** CD spectra of  $\alpha$ S or  $\alpha$ S-ZnONP complexes with MGO at 0 h. **Figure S5A:** Thermograms depicting isothermal titration curves of  $\alpha$ S titrated in the presence of ZnONP<sub>P</sub> and MGO; **Figure S5B:** Thermodynamic parameters for interaction profiling of  $\alpha$ S in the presence of ZnONP<sub>P</sub> and MGO by ITC; **Figure S6:** EDS analysis of  $\alpha$ S and  $\alpha$ S-ZnONP complexes using TEM; **Table ST3:** EDS analysis of mentioned samples.

## 29 1. Methodology for expression and purification of $\alpha$ S

The recombinant human  $\alpha$ S was expressed in *E.coli* BL21(DE3) cells carrying pET-28a plasmid that encodes for SNCA gene, following a previously established protocol with slight modifications<sup>1</sup>. For expression of  $\alpha$ S, 2 % inoculum of transformed BL21(DE3) was inoculated in 1000 mL of LB broth containing 100  $\mu$ g/mL ampicillin and grown till OD<sub>600</sub> reaches 0.6. The expression of desired protein was induced with 0.5 mM IPTG at 37 °C for 5 h. After incubation, the cells were harvested by centrifugation at 7500 rpm for 20 min. The cell pellet was re-suspended in buffer containing 10 mM Tris-HCl, 1mM EDTA, and 1 mM PMSF (pH 7.5). The solution was ultra-sonicated on ice for 40 min at 30 s interval with 80 % amplitude. The other bacterial proteins were removed by acid precipitation at pH 3.5, followed by centrifugation at 4 °C with 14000 rpm for 30 min. The pellet was then discarded and the supernatant was adjusted back to pH 7.5. The obtained supernatant was allowed to bind with Q-Sepharose at 4 °C for 3-4 h, followed by elution with 100-500 mM NaCl gradient in 10mM Tris-HCl, pH 7.5. The eluents were checked for desired protein in 10 % SDS-PAGE and dialyzed (12-14 kDa MW cut-off) against milli-Q water for 16 h at 4 °C. The obtained protein fractions were then lyophilised and stored at -20 °C for further use.

## 45 1.1. $\alpha$ S purification and characterisation

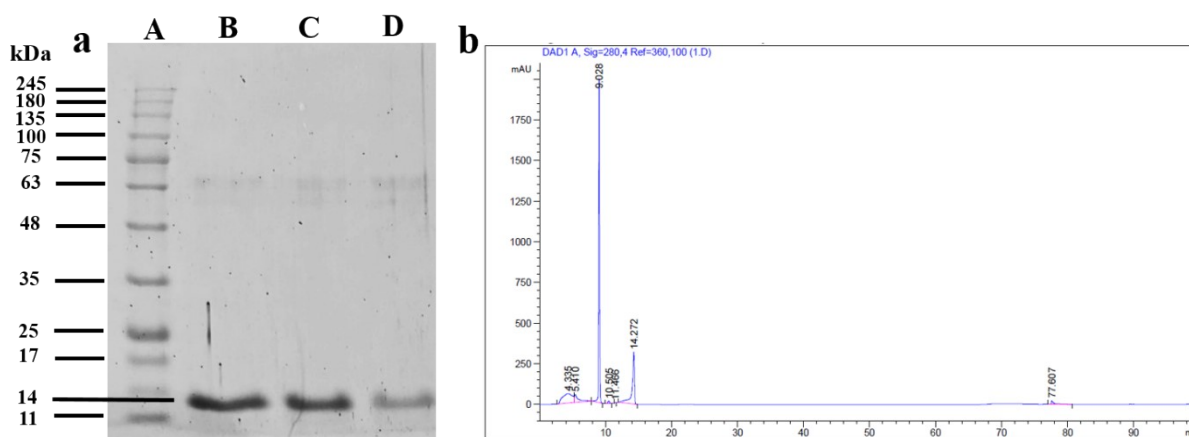

Figure S1: (a) 10 % SDS-PAGE containing lane A- protein ladder of size 245-11 kDa, lane B- 0.2 M, lane C- 0.25 M, and lane D- 0.3 M chromatographic elutes of purified  $\alpha$ S. (b) HPLC chromatogram of purified  $\alpha$ S done using C18 reverse phase column.

The chromatogram in Fig. S1b, showed that during the initial 60 min run with deionised water, most of the protein was eluted. This was followed by 30-70 % acetonitrile gradient run for 30 min to wash off about 40-50 % of weakly bound protein. In the last 10 min, 100 % acetonitrile was run down to completely remove any residual protein and for column

washing. The appearance of a single large peak in HPLC chromatogram during the initial 60 min run confirmed the presence of large monomeric population of  $\alpha$ S, indicating purity of the synthesised protein.

## 2. Methodology for synthesis of bare and surface functionalised ZnONPs

The synthesised ZnONP<sub>P</sub> with positive surface potential was prepared using chemical precipitation method, following standardised protocol from our group <sup>2</sup>. Zinc acetate dihydrate and urea (0.1 M each) with volumetric ratio of 1:4 respectively was mixed and heated at 110 °C for 2 h. The solution was centrifuged at 5000 rpm for 30 min to obtain white precipitate. It was then sonicated, vortexed, and centrifuged with deionised water for several times until it reaches pH 7, to remove traces of urea. The pellet obtained was then dried at 100 °C for 12-14 h and calcinated at 300 °C for 2 h to synthesise ZnONP<sub>P</sub> of desired size.

For surface functionalisation of prepared ZnONP<sub>P</sub> to ZnONP<sub>Y</sub> (tyrosine coated) and ZnONP<sub>W</sub> (tryptophan coated) with negative surface potential, 20 mg of bare ZnONP<sub>P</sub> was incubated with 1 mM tyrosine/tryptophan in a reaction volume of 20 mL of 10 mM phosphate buffer, pH 7.4. The prepared solutions were mixed well and sonicated for 30 min, followed by centrifugation at 6000 rpm for 15 min to obtain white precipitate. It was then washed several times with deionised water to remove excess of unbound amino acids. The obtained pellets were then dried at 60 °C for 12-14 h and stored for characterisation <sup>3</sup>.

### 2.1. Characterisation of synthesised ZnONPs

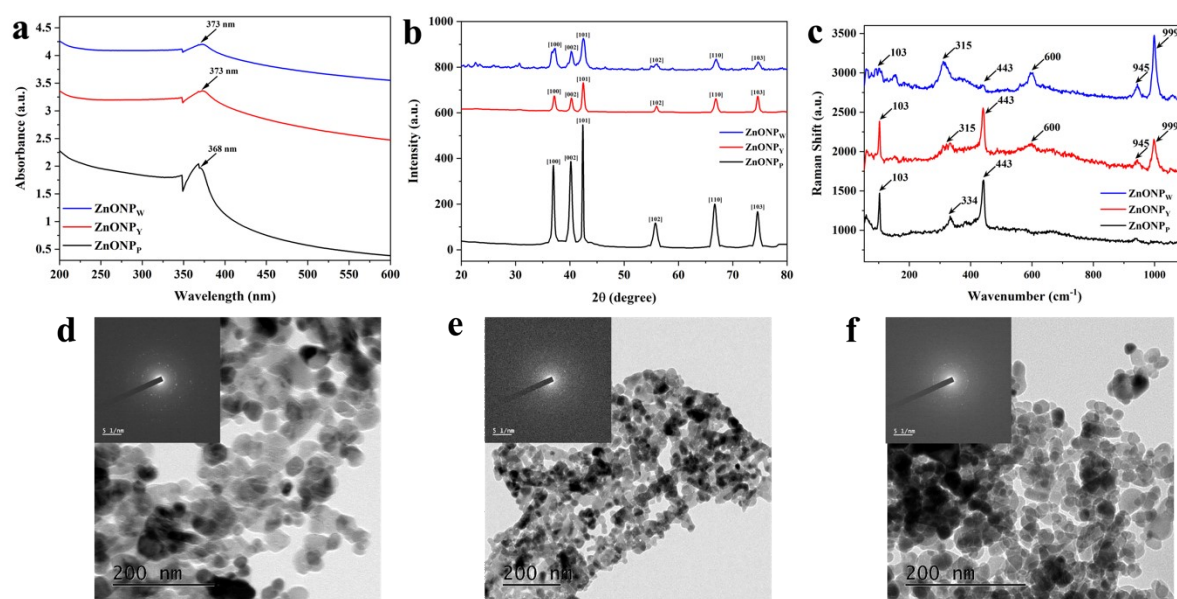

73

74

75

76

77

78 Figure S2: Characterisation of ZnONP<sub>P</sub>, ZnONP<sub>Y</sub>, and ZnONP<sub>W</sub> using (a) UV-Visible  
 79 spectra, (b) X-Ray diffraction spectra, (c) Raman spectra, (d-f) representative TEM  
 80 micrographs in 200 nm range along with SAED pattern insets for (d) ZnONP<sub>P</sub>, (e) ZnONP<sub>Y</sub>,  
 81 and (f) ZnONP<sub>W</sub> respectively.

82 Table ST1: Determination of zeta potential for synthesised ZnONPs by DLS Zeta Analyser.

| Sl. No. | Nanoparticles      | Zeta (mV) $\pm$ S.D. |
|---------|--------------------|----------------------|
| 1       | ZnONP <sub>P</sub> | 21.9 $\pm$ 6.4       |
| 2       | ZnONP <sub>Y</sub> | -18.7 $\pm$ 3.9      |
| 3       | ZnONP <sub>W</sub> | -15.1 $\pm$ 5.7      |

83

84 The photocatalytic properties of synthesised ZnONPs were determined using UV-Visible  
 85 spectrophotometer by analysing ZnONP-specific localised Surface Plasmon Resonance  
 86 (SPR) peaks. The X-ray Diffraction spectroscopy was used for determining crystalline nature,  
 87 and Raman Spectrometer was used for determining the vibrational nodes of synthesised  
 88 ZnONPs. The Transmission Electron Microscope was used for particle morphology and  
 89 SAED pattern and DLS Zeta analyser was used for characterising the surface potential of  
 90 different ZnONPs. The synthesised ZnONP<sub>P</sub> showed an SPR peak at 368 nm, and ZnONP<sub>Y</sub>  
 91 or ZnONP<sub>W</sub> showed peak shifting to  $\sim$ 373 nm which can be attributed to respective amino  
 92 acid coating (Fig. S2a). The XRD spectra showed hexagonal cubic crystalline structure with  
 93 diffraction peaks at 37° (100), 40° (002), 43° (101), 56° (102), 57° (110), and 75° (103), which  
 94 are characteristics of ZnO crystals (Fig. S2b). The characteristic ZnO peaks at  $\sim$ 103 cm<sup>-1</sup> and  
 95  $\sim$ 330-340 cm<sup>-1</sup> were observed in all three Raman spectra of ZnONPs. The peak at  $\sim$ 103 cm<sup>-1</sup>  
 96 has been associated with E2 (low) of nonpolar vibration for heavier Zn atoms and the peak at  
 97  $\sim$ 334 cm<sup>-1</sup> has been assigned to the second order structure of ZnO. This peak at  $\sim$ 334 cm<sup>-1</sup>  
 98 was shifted in surface functionalised ZnONPs to  $\sim$ 315 cm<sup>-1</sup> because of amino acid coating.  
 99 The additional peak at  $\sim$ 443 cm<sup>-1</sup> in ZnONPs was attributed to the E2 (high) mode of oxygen  
 100 displacement. This peak had a lower intensity in ZnONP<sub>Y</sub> and was almost absent in ZnONP<sub>W</sub>  
 101 due to surface functionalisation. The peak at  $\sim$ 600 nm was assigned to oxygen deficiency as

102 observed in ZnO of ZnONP<sub>Y</sub> and ZnONP<sub>W</sub>. Additional peaks at ~940-1000 cm<sup>-1</sup> corresponds  
 103 to respective amino acids present in ZnONP<sub>Y</sub> and ZnONP<sub>W</sub> (Fig. S2c). The average size of  
 104 ZnONP<sub>P</sub> was ~30-40 nm, and ~50-60 nm for ZnONP<sub>Y</sub> or ZnONP<sub>W</sub> as determined from TEM  
 105 micrographs (Fig. S2d-f). The SAED pattern (Selected Area Electron Diffraction) from TEM  
 106 (Fig. S2d-f insets) along with XRD spectra confirmed the crystalline nature of synthesised  
 107 ZnONPs. The zeta potential was +21.9 mV for ZnONP<sub>P</sub>, -18.7 mV for ZnONP<sub>Y</sub>, and -15.1  
 108 mV for ZnONP<sub>W</sub> respectively (Table ST1). Further detailed descriptions on characterisation  
 109 of ZnONPs has been reported from our group in previous studies <sup>3,4</sup>.

### 110 3. Estimation of free amines and carbonyl content in $\alpha$ S-ZnONP complexes

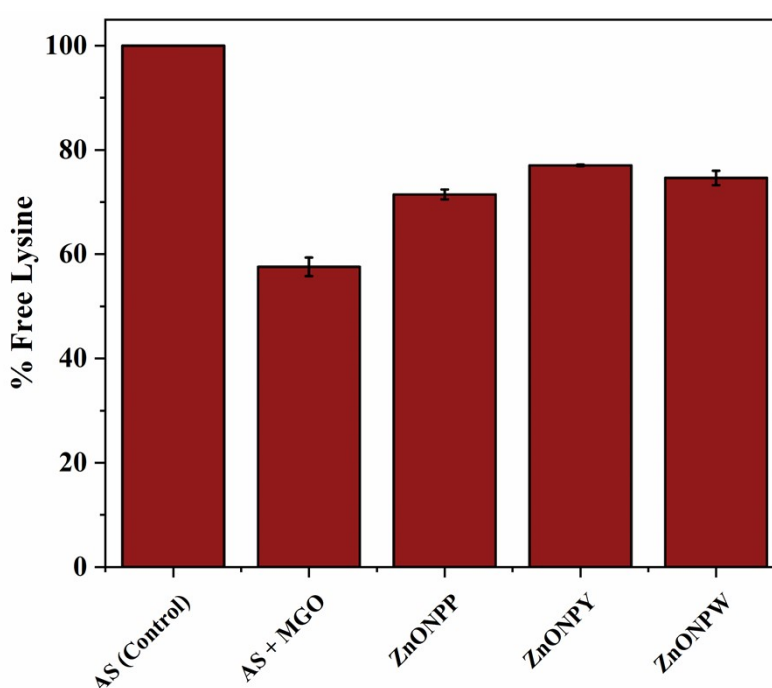

121 Figure S3: Representative bar graph for calculated free lysine percentage that reacted with  
 122 fluorescamine of 50  $\mu$ M  $\alpha$ S control,  $\alpha$ S or  $\alpha$ S complexed ZnONP (30  $\mu$ g/mL ZnONP<sub>P</sub>,  
 123 ZnONP<sub>Y</sub>, ZnONP<sub>W</sub>) in the presence of 5 mM MGO.  $\alpha$ S is represented as AS. AS control  
 124 refers to non-glycated  $\alpha$ S, incubated for 144 h under similar conditions.

125 Table ST2: Characterisation of fluorescence intensity at 490 nm (glycated lysine) and  
 126 absorbance at 370 nm (carbonyl content) for mentioned samples.

| Sl. No. | Samples              | Fluorescence Intensity at 490 nm | Absorbance at 370 nm |
|---------|----------------------|----------------------------------|----------------------|
| 1       | $\alpha$ S (Control) | 23565 $\pm$ 35                   | 0.043 $\pm$ 0.012    |

|    |                                       |                 |                   |
|----|---------------------------------------|-----------------|-------------------|
| 2  | $\alpha$ S + MGO                      | $13567 \pm 420$ | $0.381 \pm 0.003$ |
| 3  | $\alpha$ S + MGO + ZnONP <sub>P</sub> | $16845 \pm 224$ | $0.280 \pm 0.008$ |
| 4  | $\alpha$ S + MGO + ZnONP <sub>Y</sub> | $18158 \pm 34$  | $0.228 \pm 0.007$ |
| 5  | $\alpha$ S + MGO + ZnONP <sub>W</sub> | $17589 \pm 326$ | $0.242 \pm 0.020$ |
| 6  | $\alpha$ S Monomer (0 h)              | $23745 \pm 220$ | $0.039 \pm 0.009$ |
| 7  | MGO                                   | $341 \pm 6$     | $0.048 \pm 0.019$ |
| 8  | MGO + ZnONP <sub>P</sub>              | $348 \pm 12$    | $0.059 \pm 0.015$ |
| 9  | MGO + ZnONP <sub>Y</sub>              | $361.5 \pm 12$  | $0.046 \pm 0.010$ |
| 10 | MGO + ZnONP <sub>W</sub>              | $393 \pm 59$    | $0.045 \pm 0.017$ |

#### 4. Circular Dichroism spectra at 0 h

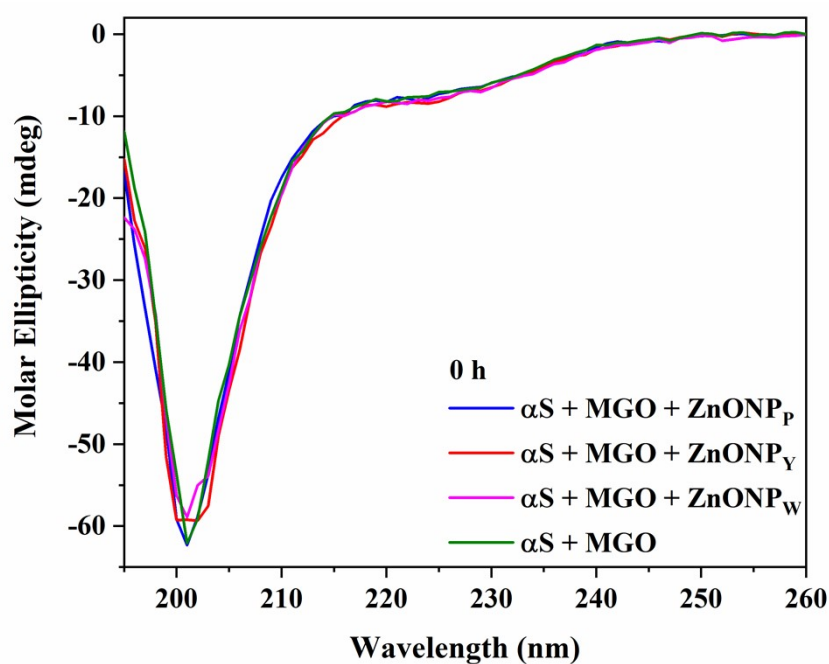

Figure S4: Circular Dichroism spectra of 50  $\mu$ M  $\alpha$ S or  $\alpha$ S-ZnONP complexes in the presence of 5 mM MGO at 0 h. The ZnONPs used were 30  $\mu$ g/mL of ZnONP<sub>P</sub>, ZnONP<sub>Y</sub>, and ZnONP<sub>W</sub> respectively.

#### 5. Methodology for Isothermal titration calorimetry (ITC)

143 Isothermal titration calorimetry experiments were performed on Microcal PEAQ ITC  
 144 (Malvern Panalytical, UK). 50  $\mu\text{M}$   $\alpha\text{S}$  was titrated into the cell containing 30  $\mu\text{g/mL}$  ( $\sim 16.3$   
 145  $\mu\text{M}$ )  $\text{ZnONP}_p$ . In another experiment, 500  $\mu\text{M}$  MGO was titrated into the cell containing 50  
 146  $\mu\text{M}$   $\alpha\text{S}$  at 25  $^\circ\text{C}$ . A total of 20 injections were carried out, in which the first injection  
 147 contained 0.4  $\mu\text{L}$  of ligand, whereas the following 19 injections included 2  $\mu\text{L}$  each of ligand  
 148 solution. The time spacing between two consecutive injections was 180 s and the mixing  
 149 speed was kept at 800 rpm. For each experiment, control titrations of  $\alpha\text{S}$ ,  $\text{ZnONP}_p$ , and MGO  
 150 in 1X PBS buffer were performed. The obtained thermograms indicating the dilution-cum-  
 151 solvation heat, were subtracted from the  $\alpha\text{S}$  titration into  $\text{ZnONP}_p$  and MGO titration into  $\alpha\text{S}$   
 152 thermograms. The thermodynamic parameters were calculated using the stoichiometric  
 153 binding model with one binding site, provided in instrument-integrated Malvern software.

#### 154 **5.1. Equations for one site binding model of multiple injection method in ITC**

155 In ITC experiments involving one site binding model (1:1 stoichiometric binding) for  
 156 calculation of thermodynamic parameters, the following equations were used by the software  
 157 provided with the instrument:

$$158 \quad K = \frac{\Theta}{(1 - \Theta)[X]} \quad [Eq\ 1]$$

159  $K$  = binding constant,  $\Theta$  = fraction of sites occupied by titrant (ligand in syringe),  $[X]$  = free  
 160 concentration of ligand in active volume

$$161 \quad \Delta G = -nRT \ln K \quad [Eq\ 2]$$

162  $\Delta G$  = Gibbs energy of binding,  $n$  = number of sites,  $T$  = temperature,  $R$  = gas constant.

$$163 \quad \Delta H = \frac{Q}{n\Theta M_t V_0} \quad [Eq\ 3]$$

164  $\Delta H$  = molar heat of titrant binding,  $n$  = number of sites,  $[M]$  = free concentration of titrate in  
 165 active volume,  $Q$  = total heat content of the solution present in  $V_0$  (determined relative to zero  
 166 for the unliganded population, i.e., heat change for each injection of the titrant) at fractional  
 167 saturation  $\Theta$

$$168 \quad \Delta S = \frac{(\Delta H - \Delta G)}{T} \quad [Eq\ 4]$$

169 In one-site binding model,  $\Delta H$  is directly fitted as heat of 100 % binding and steepness of the  
170 rise to the saturation is related to binding affinity  $K_D$ . The steepness of the region is directly  
171 proportional to sample concentration. The stoichiometry (n) of experimental data is  
172 calculated as midpoint of titration which is in-between 100 % and 0 % binding.

## 173 5.2. Interaction profiling of $\alpha$ S and ZnONP<sub>p</sub> or MGO in 1X PBS buffer by ITC

174 Isothermal titration calorimetry (ITC) was used to investigate the interaction profiling of  $\alpha$ S  
175 with ZnONP<sub>p</sub> and MGO at 25 °C for determining various thermodynamic parameters. For  
176 this study, 50  $\mu$ M  $\alpha$ S was titrated into the cell containing 30  $\mu$ g/mL ZnONP<sub>p</sub>. In another  
177 experiment, 500  $\mu$ M MGO was titrated into the cell containing 50  $\mu$ M  $\alpha$ S. The Fig. S5A (top  
178 panels) represented the heat evolved/absorbed for each 2  $\mu$ L injection of titrant (50  $\mu$ M  $\alpha$ S or  
179 500  $\mu$ M MGO) into the cell with respect to time. Additionally, the bottom panels of Fig. S5A  
180 represented the heat flow per mole of titrant against apparent molar ratio of titrant: titrate in  
181 the cell. The dissociation constant was in the range of micromolar, indicating higher affinity  
182 between the interfaces, i.e.,  $\alpha$ S and ZnONP<sub>p</sub> or  $\alpha$ S and MGO interacting surfaces (Fig. S5B).  
183 The calculated amount of enthalpy change ( $\Delta H$ ), entropy change ( $T\Delta S$ ), free energy change  
184 ( $\Delta G$ ), and apparent binding constant ( $K_D$ ) are given in Fig. S5B. When  $\alpha$ S was titrated  
185 against ZnONP<sub>p</sub> (Fig. S5Aa), the reaction was exothermic in nature while MGO titration  
186 against  $\alpha$ S (Fig. S5Ab) was endothermic in nature. However, heat of dilution of MGO was  
187 also endothermic in nature. Therefore, after subtraction with MGO's heat of dilution, the  
188 resultant heat evolved was exothermic. The  $\Delta H$  was favourable and  $T\Delta S$  was unfavourable  
189 for both the reaction titrations (Fig. S5B). Therefore,  $\alpha$ S interaction with ZnONP<sub>p</sub> or MGO  
190 were enthalpically driven ( $\Delta H < 0$ ) with favourable enthalpy contribution. Furthermore,  
191 entropy change substantiates with degree of randomness in the system, therefore more  
192 negative  $T\Delta S$  indicates conformational constraints in protein <sup>5</sup>. The data altogether indicated  
193 that  $\alpha$ S interaction with ZnONP<sub>p</sub> or MGO showed electrostatic and Van der Waals  
194 interactions, along with release of caged water into the surrounding. The enthalpic and  
195 entropic factors compensated each other, making Gibbs free energy ( $\Delta G$ ) favourable. The  $\Delta G$   
196 was  $\sim -6.4$  kcal/mol when  $\alpha$ S adsorbed onto ZnONP<sub>p</sub> interface and  $\Delta G$  was  $\sim -5.8$  kcal/mol  
197 upon MGO interaction (Fig. S5B). The negative  $\Delta G$  indicated spontaneous binding,  
198 suggesting multiple non-covalent interactions in the binding process <sup>6</sup>. Therefore,  $\alpha$ S  
199 adsorption onto ZnONP<sub>p</sub> or  $\alpha$ S interaction with MGO were non-specific in nature, with  
200 similar binding affinity. Therefore, in solution, ZnONP<sub>p</sub> and MGO would compete for  $\alpha$ S

201 binding. Hence, glycation  $\alpha$ S when complexed with ZnONP interfaces, will lead to flocs  
 202 formation along with reduction in AGE formation. In summary, it can be concluded that  $\alpha$ S  
 203 adsorption onto ZnONP interface, inhibits glycation along with reduced self-assembly of  
 204 protein monomers.

205

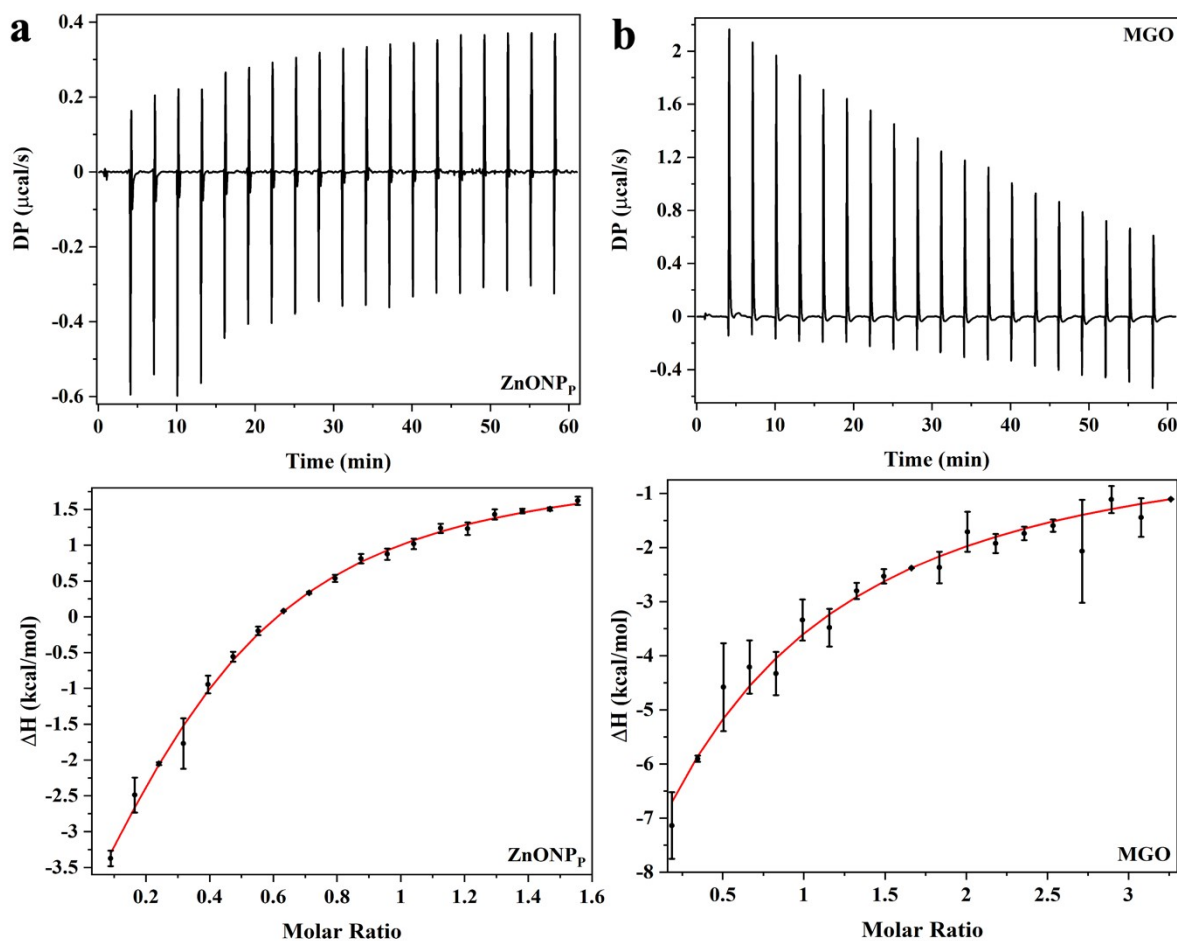

206 Figure S5A: Thermograms (top panels) and binding isotherms (bottom panels) depicting  
 207 isothermal titration curves of 50  $\mu\text{M}$   $\alpha$ S titrated in the presence of (a) 30  $\mu\text{g/mL}$  ZnONP<sub>p</sub>,  
 208 and (b) 500  $\mu\text{M}$  MGO at 25  $^{\circ}\text{C}$ . Red lines (bottom panels) represents the best fitting using  
 209 one site binding models for data in panels (a-b).

210

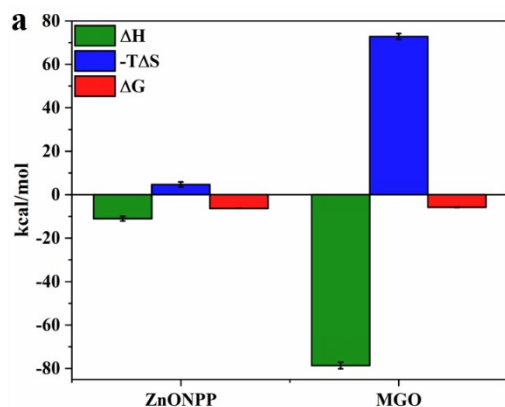

**b**

| Sl. No. |        | $\Delta H$ , kcal/mol | $-T\Delta S$ , kcal/mol | $-\Delta S$ , kcal/mol/K | $\Delta G$ , kcal/mol | Dissociation constant ( $K_D$ ), $\mu M$ |
|---------|--------|-----------------------|-------------------------|--------------------------|-----------------------|------------------------------------------|
| 1       | ZnONPP | $-11.05 \pm 1.06$     | $4.68 \pm 1.17$         | 0.02                     | $-6.37 \pm 0.08$      | $21.95 \pm 2.9$                          |
| 2       | MGO    | $-78.65 \pm 1.48$     | $72.85 \pm 1.34$        | 0.24                     | $-5.81 \pm 0.13$      | $65.05 \pm 0.64$                         |

211

212 Figure S5B: (a) Signature plots calculated by applying 1:1 binding model to the experimental  
 213 ITC measurements for interaction profiling of  $\alpha S$  complexed with ZnONPP and MGO. (b)  
 214 Representative mean and standard deviations of calculated thermodynamic parameters  
 215 obtained from three independent experiments.

## 216 6. Energy Dispersive Spectroscopy (EDS) analysis from TEM micrographs

217

218

219

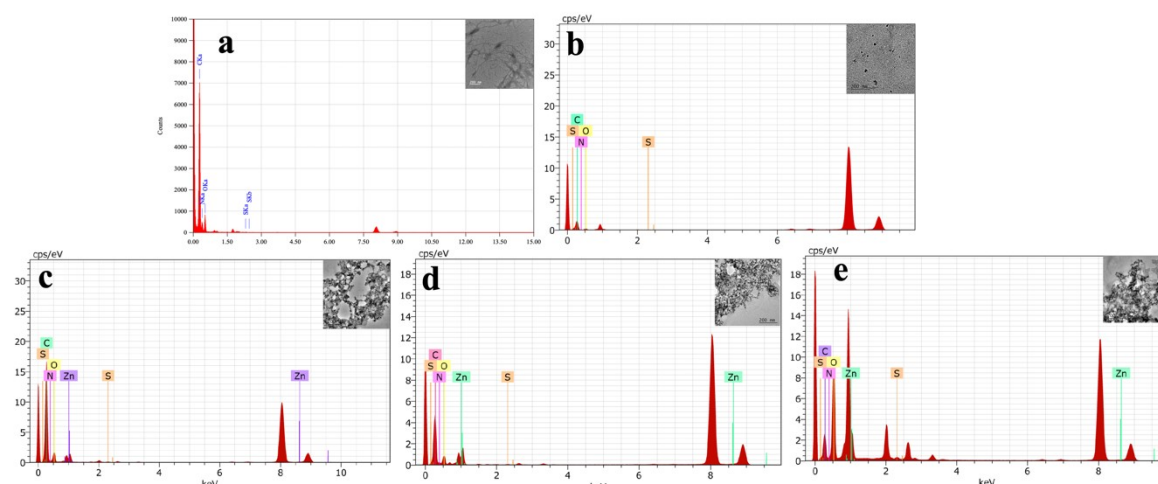

220 Figure S6: EDS analysis of 50  $\mu M$  (a)  $\alpha S$  only (fibrils), (b) glycated  $\alpha S$  (oligomers), (c)  $\alpha S$ -  
 221 ZnONPP, (d)  $\alpha S$ -ZnONPY, and (e)  $\alpha S$ -ZnONPW. The ZnONPs and MGO concentrations  
 222 were kept at 30  $\mu g/mL$  and 5 mM respectively.

223 Table ST3: EDS analysis of  $\alpha S$  and  $\alpha S$ -ZnONP complexes using TEM

| Sl.No. | Sample Name                |     | Mass % | Atom % |
|--------|----------------------------|-----|--------|--------|
| 1      | $\alpha S$ Control (144 h) | C K | 91.99  | 93.60  |
|        |                            | N K | 2.91   | 2.54   |
|        |                            | O K | 5.00   | 3.82   |
|        |                            | S K | 0.10   | 0.04   |



|                  |      |      |      |      |      |      |      |     |     |      |
|------------------|------|------|------|------|------|------|------|-----|-----|------|
| (alpha=0.05)?    |      |      |      |      |      |      |      |     |     |      |
| P value summary  | **** | **** | **** | **** | **** | **** | **** | *** | *** | **** |
| Number of values | 230  | 230  | 230  | 230  | 230  | 230  | 230  | 230 | 230 | 230  |

227 None of the groups followed normal distribution, thus a non-parametric ANOVA (Kruskal-  
228 Wallis) test was performed.

|                                         |             |
|-----------------------------------------|-------------|
| Kruskal-Wallis test                     |             |
| P value                                 | <0.0001     |
| Exact or approximate P value?           | Approximate |
| P value summary                         | ****        |
| Do the medians vary signif. (P < 0.05)? | Yes         |
| Number of groups                        | 10          |
| Kruskal-Wallis statistic                | 1762        |
| Data summary                            |             |
| Number of treatments (columns)          | 10          |
| Number of values (total)                | 2300        |

229 There was significant difference found between the groups, and thus group-wise comparisons  
230 were also performed and reported.

|                                  |                 |              |         |                  |     |
|----------------------------------|-----------------|--------------|---------|------------------|-----|
| Number of families               | 1               |              |         |                  |     |
| Number of comparisons per family | 45              |              |         |                  |     |
| Alpha                            | 0.05            |              |         |                  |     |
| Dunn's multiple comparisons test | Mean rank diff. | Significant? | Summary | Adjusted P Value |     |
| AS+MO+P vs. AS+MO+Y              | -48.91          | No           | ns      | >0.9999          | A-B |
| AS+MO+P vs. AS+MO+W              | 215.5           | Yes          | *       | 0.0226           | A-C |
| AS+MO+P vs. AS+MO                | -201.2          | No           | ns      | 0.052            | A-D |
| AS+MO+P vs. AS incubated         | -359.3          | Yes          | ****    | <0.0001          | A-E |
| AS+MO+P vs. AS Fresh             | -19.61          | No           | ns      | >0.9999          | A-F |
| AS+MO+P vs. MO                   | 731.4           | Yes          | ****    | <0.0001          | A-G |
| AS+MO+P vs. MO+P                 | 1082            | Yes          | ****    | <0.0001          | A-H |
| AS+MO+P vs. MO+Y                 | 1085            | Yes          | ****    | <0.0001          | A-I |
| AS+MO+P vs.                      | 1311            | Yes          | ****    | <0.0001          | A-J |

|                              |        |     |      |         |         |
|------------------------------|--------|-----|------|---------|---------|
| MO+W                         |        |     |      |         |         |
| AS+MO+Y vs.<br>AS+MO+W       | 264.4  | Yes | ***  | 0.0009  | B-<br>C |
| AS+MO+Y vs.<br>AS+MO         | -152.3 | No  | ns   | 0.6258  | B-<br>D |
| AS+MO+Y vs. AS<br>incubated  | -310.4 | Yes | **** | <0.0001 | B-<br>E |
| AS+MO+Y vs. AS<br>Fresh      | 29.3   | No  | ns   | >0.9999 | B-<br>F |
| AS+MO+Y vs. MO               | 780.3  | Yes | **** | <0.0001 | B-<br>G |
| AS+MO+Y vs.<br>MO+P          | 1131   | Yes | **** | <0.0001 | B-<br>H |
| AS+MO+Y vs.<br>MO+Y          | 1134   | Yes | **** | <0.0001 | B-I     |
| AS+MO+Y vs.<br>MO+W          | 1360   | Yes | **** | <0.0001 | B-J     |
| AS+MO+W vs.<br>AS+MO         | -416.7 | Yes | **** | <0.0001 | C-<br>D |
| AS+MO+W vs. AS<br>incubated  | -574.8 | Yes | **** | <0.0001 | C-<br>E |
| AS+MO+W vs. AS<br>Fresh      | -235.1 | Yes | **   | 0.0066  | C-<br>F |
| AS+MO+W vs. MO               | 515.9  | Yes | **** | <0.0001 | C-<br>G |
| AS+MO+W vs.<br>MO+P          | 866.2  | Yes | **** | <0.0001 | C-<br>H |
| AS+MO+W vs.<br>MO+Y          | 869.1  | Yes | **** | <0.0001 | C-I     |
| AS+MO+W vs.<br>MO+W          | 1096   | Yes | **** | <0.0001 | C-J     |
| AS+MO vs. AS<br>incubated    | -158.1 | No  | ns   | 0.481   | D-<br>E |
| AS+MO vs. AS<br>Fresh        | 181.6  | No  | ns   | 0.1512  | D-<br>F |
| AS+MO vs. MO                 | 932.6  | Yes | **** | <0.0001 | D-<br>G |
| AS+MO vs. MO+P               | 1283   | Yes | **** | <0.0001 | D-<br>H |
| AS+MO vs. MO+Y               | 1286   | Yes | **** | <0.0001 | D-I     |
| AS+MO vs. MO+W               | 1512   | Yes | **** | <0.0001 | D-J     |
| AS incubated vs. AS<br>Fresh | 339.7  | Yes | **** | <0.0001 | E-F     |
| AS incubated vs. MO          | 1091   | Yes | **** | <0.0001 | E-<br>G |
| AS incubated vs.<br>MO+P     | 1441   | Yes | **** | <0.0001 | E-<br>H |
| AS incubated vs.<br>MO+Y     | 1444   | Yes | **** | <0.0001 | E-I     |

|                          |             |             |                 |         |     |        |
|--------------------------|-------------|-------------|-----------------|---------|-----|--------|
| AS incubated vs. MO+W    | 1671        | Yes         | ****            | <0.0001 | E-J |        |
| AS Fresh vs. MO          | 751         | Yes         | ****            | <0.0001 | F-G |        |
| AS Fresh vs. MO+P        | 1101        | Yes         | ****            | <0.0001 | F-H |        |
| AS Fresh vs. MO+Y        | 1104        | Yes         | ****            | <0.0001 | F-I |        |
| AS Fresh vs. MO+W        | 1331        | Yes         | ****            | <0.0001 | F-J |        |
| MO vs. MO+P              | 350.3       | Yes         | ****            | <0.0001 | G-H |        |
| MO vs. MO+Y              | 353.2       | Yes         | ****            | <0.0001 | G-I |        |
| MO vs. MO+W              | 579.8       | Yes         | ****            | <0.0001 | G-J |        |
| MO+P vs. MO+Y            | 2.917       | No          | ns              | >0.9999 | H-I |        |
| MO+P vs. MO+W            | 229.5       | Yes         | **              | 0.0095  | H-J |        |
| MO+Y vs. MO+W            | 226.6       | Yes         | *               | 0.0114  | I-J |        |
|                          |             |             |                 |         |     |        |
| Test details             | Mean rank 1 | Mean rank 2 | Mean rank diff. | n1      | n2  | Z      |
| AS+MO+P vs. AS+MO+Y      | 1530        | 1579        | -48.91          | 230     | 230 | 0.7898 |
| AS+MO+P vs. AS+MO+W      | 1530        | 1315        | 215.5           | 230     | 230 | 3.48   |
| AS+MO+P vs. AS+MO        | 1530        | 1731        | -201.2          | 230     | 230 | 3.249  |
| AS+MO+P vs. AS incubated | 1530        | 1889        | -359.3          | 230     | 230 | 5.802  |
| AS+MO+P vs. AS Fresh     | 1530        | 1550        | -19.61          | 230     | 230 | 0.3167 |
| AS+MO+P vs. MO           | 1530        | 798.6       | 731.4           | 230     | 230 | 11.81  |
| AS+MO+P vs. MO+P         | 1530        | 448.3       | 1082            | 230     | 230 | 17.47  |
| AS+MO+P vs. MO+Y         | 1530        | 445.4       | 1085            | 230     | 230 | 17.51  |
| AS+MO+P vs. MO+W         | 1530        | 218.8       | 1311            | 230     | 230 | 21.17  |
| AS+MO+Y vs. AS+MO+W      | 1579        | 1315        | 264.4           | 230     | 230 | 4.27   |
| AS+MO+Y vs. AS+MO        | 1579        | 1731        | -152.3          | 230     | 230 | 2.46   |
| AS+MO+Y vs. AS incubated | 1579        | 1889        | -310.4          | 230     | 230 | 5.012  |
| AS+MO+Y vs. AS Fresh     | 1579        | 1550        | 29.3            | 230     | 230 | 0.4731 |
| AS+MO+Y vs. MO           | 1579        | 798.6       | 780.3           | 230     | 230 | 12.6   |
| AS+MO+Y vs. MO+P         | 1579        | 448.3       | 1131            | 230     | 230 | 18.26  |
| AS+MO+Y vs. MO+Y         | 1579        | 445.4       | 1134            | 230     | 230 | 18.3   |

|                           |       |       |        |     |     |         |
|---------------------------|-------|-------|--------|-----|-----|---------|
| AS+MO+Y vs. MO+W          | 1579  | 218.8 | 1360   | 230 | 230 | 21.96   |
| AS+MO+W vs. AS+MO         | 1315  | 1731  | -416.7 | 230 | 230 | 6.729   |
| AS+MO+W vs. AS incubated  | 1315  | 1889  | -574.8 | 230 | 230 | 9.282   |
| AS+MO+W vs. AS Fresh      | 1315  | 1550  | -235.1 | 230 | 230 | 3.796   |
| AS+MO+W vs. MO            | 1315  | 798.6 | 515.9  | 230 | 230 | 8.331   |
| AS+MO+W vs. MO+P          | 1315  | 448.3 | 866.2  | 230 | 230 | 13.99   |
| AS+MO+W vs. MO+Y          | 1315  | 445.4 | 869.1  | 230 | 230 | 14.03   |
| AS+MO+W vs. MO+W          | 1315  | 218.8 | 1096   | 230 | 230 | 17.69   |
| AS+MO vs. AS incubated    | 1731  | 1889  | -158.1 | 230 | 230 | 2.553   |
| AS+MO vs. AS Fresh        | 1731  | 1550  | 181.6  | 230 | 230 | 2.933   |
| AS+MO vs. MO              | 1731  | 798.6 | 932.6  | 230 | 230 | 15.06   |
| AS+MO vs. MO+P            | 1731  | 448.3 | 1283   | 230 | 230 | 20.72   |
| AS+MO vs. MO+Y            | 1731  | 445.4 | 1286   | 230 | 230 | 20.76   |
| AS+MO vs. MO+W            | 1731  | 218.8 | 1512   | 230 | 230 | 24.42   |
| AS incubated vs. AS Fresh | 1889  | 1550  | 339.7  | 230 | 230 | 5.485   |
| AS incubated vs. MO       | 1889  | 798.6 | 1091   | 230 | 230 | 17.61   |
| AS incubated vs. MO+P     | 1889  | 448.3 | 1441   | 230 | 230 | 23.27   |
| AS incubated vs. MO+Y     | 1889  | 445.4 | 1444   | 230 | 230 | 23.32   |
| AS incubated vs. MO+W     | 1889  | 218.8 | 1671   | 230 | 230 | 26.98   |
| AS Fresh vs. MO           | 1550  | 798.6 | 751    | 230 | 230 | 12.13   |
| AS Fresh vs. MO+P         | 1550  | 448.3 | 1101   | 230 | 230 | 17.78   |
| AS Fresh vs. MO+Y         | 1550  | 445.4 | 1104   | 230 | 230 | 17.83   |
| AS Fresh vs. MO+W         | 1550  | 218.8 | 1331   | 230 | 230 | 21.49   |
| MO vs. MO+P               | 798.6 | 448.3 | 350.3  | 230 | 230 | 5.656   |
| MO vs. MO+Y               | 798.6 | 445.4 | 353.2  | 230 | 230 | 5.704   |
| MO vs. MO+W               | 798.6 | 218.8 | 579.8  | 230 | 230 | 9.363   |
| MO+P vs. MO+Y             | 448.3 | 445.4 | 2.917  | 230 | 230 | 0.04711 |
| MO+P vs. MO+W             | 448.3 | 218.8 | 229.5  | 230 | 230 | 3.707   |
| MO+Y vs. MO+W             | 445.4 | 218.8 | 226.6  | 230 | 230 | 3.659   |

231

## 232 7.2. Statistical analysis for fluorescence intensity data at 370 nm

233 There was significant difference found between the groups, and thus group-wise comparisons

234 were also performed and reported.

|  |      |       |       |      |    |    |    |      |      |       |
|--|------|-------|-------|------|----|----|----|------|------|-------|
|  | AS+M | AS+MO | AS+MO | AS+M | AS | AS | MO | MO+3 | MO+3 | MO+30 |
|--|------|-------|-------|------|----|----|----|------|------|-------|

|                                     | O+P     | +Y      | +W      | O       | incubated | fresh   |         | 0P      | 0Y      | W       |
|-------------------------------------|---------|---------|---------|---------|-----------|---------|---------|---------|---------|---------|
| Test for normal distribution        |         |         |         |         |           |         |         |         |         |         |
| Shapiro-Wilk test                   |         |         |         |         |           |         |         |         |         |         |
| W                                   | 0.9161  | 0.9152  | 0.9153  | 0.9185  | 0.793     | 0.9192  | 0.8764  | 0.8801  | 0.8749  | 0.8753  |
| P value                             | <0.0001 | <0.0001 | <0.0001 | <0.0001 | <0.0001   | <0.0001 | <0.0001 | <0.0001 | <0.0001 | <0.0001 |
| Passed normality test (alpha=0.05)? | No      | No      | No      | No      | No        | No      | No      | No      | No      | No      |
| P value summary                     | ****    | ****    | ****    | ****    | ****      | ****    | ****    | ****    | ****    | ****    |
| Number of values                    | 415     | 415     | 415     | 415     | 415       | 415     | 415     | 415     | 415     | 415     |

235 None of the groups followed normal distribution, thus a non-parametric ANOVA (Kruskal-Wallis)  
236 test was performed.

|                                         |             |
|-----------------------------------------|-------------|
| Kruskal-Wallis test                     |             |
| P value                                 | <0.0001     |
| Exact or approximate P value?           | Approximate |
| P value summary                         | ****        |
| Do the medians vary signif. (P < 0.05)? | Yes         |
| Number of groups                        | 10          |
| Kruskal-Wallis statistic                | 2323        |
|                                         |             |
| Data summary                            |             |
| Number of treatments (columns)          | 10          |
| Number of values (total)                | 4150        |

237 There was significant difference found between the groups, and thus group-wise comparisons  
238 were also performed and reported.

|                                  |      |
|----------------------------------|------|
| Number of families               | 1    |
| Number of comparisons per family | 45   |
| Alpha                            | 0.05 |

239

| Dunn's multiple comparisons test | Mean rank diff. | Significant? | Summary | Adjusted P Value |     |
|----------------------------------|-----------------|--------------|---------|------------------|-----|
| AS+MO+P vs. AS+MO+Y              | 40.57           | No           | ns      | >0.9999          | A-B |
| AS+MO+P vs. AS+MO+W              | 9.06            | No           | ns      | >0.9999          | A-C |
| AS+MO+P vs. AS+MO                | -312.9          | Yes          | **      | 0.0076           | A-D |
| AS+MO+P vs. AS incubated         | 1866            | Yes          | ****    | <0.0001          | A-E |

|                             |        |     |      |         |     |
|-----------------------------|--------|-----|------|---------|-----|
| AS+MO+P vs. AS fresh        | 2588   | Yes | **** | <0.0001 | A-F |
| AS+MO+P vs. MO              | 1215   | Yes | **** | <0.0001 | A-G |
| AS+MO+P vs. MO+30P          | 1244   | Yes | **** | <0.0001 | A-H |
| AS+MO+P vs. MO+30Y          | 1186   | Yes | **** | <0.0001 | A-I |
| AS+MO+P vs. MO+30W          | 1277   | Yes | **** | <0.0001 | A-J |
| AS+MO+Y vs.<br>AS+MO+W      | -31.51 | No  | ns   | >0.9999 | B-C |
| AS+MO+Y vs. AS+MO           | -353.4 | Yes | ***  | 0.001   | B-D |
| AS+MO+Y vs. AS<br>incubated | 1826   | Yes | **** | <0.0001 | B-E |
| AS+MO+Y vs. AS fresh        | 2547   | Yes | **** | <0.0001 | B-F |
| AS+MO+Y vs. MO              | 1175   | Yes | **** | <0.0001 | B-G |
| AS+MO+Y vs. MO+30P          | 1204   | Yes | **** | <0.0001 | B-H |
| AS+MO+Y vs. MO+30Y          | 1146   | Yes | **** | <0.0001 | B-I |
| AS+MO+Y vs. MO+30W          | 1236   | Yes | **** | <0.0001 | B-J |
| AS+MO+W vs. AS+MO           | -321.9 | Yes | **   | 0.0049  | C-D |
| AS+MO+W vs. AS<br>incubated | 1857   | Yes | **** | <0.0001 | C-E |
| AS+MO+W vs. AS fresh        | 2579   | Yes | **** | <0.0001 | C-F |
| AS+MO+W vs. MO              | 1206   | Yes | **** | <0.0001 | C-G |
| AS+MO+W vs. MO+30P          | 1235   | Yes | **** | <0.0001 | C-H |
| AS+MO+W vs. MO+30Y          | 1177   | Yes | **** | <0.0001 | C-I |
| AS+MO+W vs. MO+30W          | 1268   | Yes | **** | <0.0001 | C-J |
| AS+MO vs. AS incubated      | 2179   | Yes | **** | <0.0001 | D-E |
| AS+MO vs. AS fresh          | 2901   | Yes | **** | <0.0001 | D-F |
| AS+MO vs. MO                | 1528   | Yes | **** | <0.0001 | D-G |
| AS+MO vs. MO+30P            | 1557   | Yes | **** | <0.0001 | D-H |
| AS+MO vs. MO+30Y            | 1499   | Yes | **** | <0.0001 | D-I |
| AS+MO vs. MO+30W            | 1590   | Yes | **** | <0.0001 | D-J |
| AS incubated vs. AS fresh   | 721.6  | Yes | **** | <0.0001 | E-F |
| AS incubated vs. MO         | -651.1 | Yes | **** | <0.0001 | E-G |
| AS incubated vs. MO+30P     | -621.8 | Yes | **** | <0.0001 | E-H |
| AS incubated vs. MO+30Y     | -680   | Yes | **** | <0.0001 | E-I |
| AS incubated vs. MO+30W     | -589.3 | Yes | **** | <0.0001 | E-J |
| AS fresh vs. MO             | -1373  | Yes | **** | <0.0001 | F-G |
| AS fresh vs. MO+30P         | -1343  | Yes | **** | <0.0001 | F-H |
| AS fresh vs. MO+30Y         | -1402  | Yes | **** | <0.0001 | F-I |
| AS fresh vs. MO+30W         | -1311  | Yes | **** | <0.0001 | F-J |
| MO vs. MO+30P               | 29.23  | No  | ns   | >0.9999 | G-H |
| MO vs. MO+30Y               | -28.94 | No  | ns   | >0.9999 | G-I |
| MO vs. MO+30W               | 61.77  | No  | ns   | >0.9999 | G-J |
| MO+30P vs. MO+30Y           | -58.17 | No  | ns   | >0.9999 | H-I |
| MO+30P vs. MO+30W           | 32.54  | No  | ns   | >0.9999 | H-J |
| MO+30Y vs. MO+30W           | 90.71  | No  | ns   | >0.9999 | I-J |

240

| Test details        | Mean rank<br>1 | Mean rank<br>2 | Mean rank<br>diff. | n1  | n2  | Z      |
|---------------------|----------------|----------------|--------------------|-----|-----|--------|
| AS+MO+P vs. AS+MO+Y | 2987           | 2946           | 40.57              | 415 | 415 | 0.4878 |

|                             |      |      |        |     |     |        |
|-----------------------------|------|------|--------|-----|-----|--------|
| AS+MO+P vs. AS+MO+W         | 2987 | 2978 | 9.06   | 415 | 415 | 0.1089 |
| AS+MO+P vs. AS+MO           | 2987 | 3300 | -312.9 | 415 | 415 | 3.761  |
| AS+MO+P vs. AS<br>incubated | 2987 | 1121 | 1866   | 415 | 415 | 22.44  |
| AS+MO+P vs. AS fresh        | 2987 | 399  | 2588   | 415 | 415 | 31.11  |
| AS+MO+P vs. MO              | 2987 | 1772 | 1215   | 415 | 415 | 14.61  |
| AS+MO+P vs. MO+30P          | 2987 | 1742 | 1244   | 415 | 415 | 14.96  |
| AS+MO+P vs. MO+30Y          | 2987 | 1801 | 1186   | 415 | 415 | 14.26  |
| AS+MO+P vs. MO+30W          | 2987 | 1710 | 1277   | 415 | 415 | 15.35  |
| AS+MO+Y vs.<br>AS+MO+W      | 2946 | 2978 | -31.51 | 415 | 415 | 0.3789 |
| AS+MO+Y vs. AS+MO           | 2946 | 3300 | -353.4 | 415 | 415 | 4.249  |
| AS+MO+Y vs. AS<br>incubated | 2946 | 1121 | 1826   | 415 | 415 | 21.95  |
| AS+MO+Y vs. AS fresh        | 2946 | 399  | 2547   | 415 | 415 | 30.62  |
| AS+MO+Y vs. MO              | 2946 | 1772 | 1175   | 415 | 415 | 14.12  |
| AS+MO+Y vs. MO+30P          | 2946 | 1742 | 1204   | 415 | 415 | 14.47  |
| AS+MO+Y vs. MO+30Y          | 2946 | 1801 | 1146   | 415 | 415 | 13.77  |
| AS+MO+Y vs. MO+30W          | 2946 | 1710 | 1236   | 415 | 415 | 14.86  |
| AS+MO+W vs. AS+MO           | 2978 | 3300 | -321.9 | 415 | 415 | 3.87   |
| AS+MO+W vs. AS<br>incubated | 2978 | 1121 | 1857   | 415 | 415 | 22.33  |
| AS+MO+W vs. AS fresh        | 2978 | 399  | 2579   | 415 | 415 | 31     |
| AS+MO+W vs. MO              | 2978 | 1772 | 1206   | 415 | 415 | 14.5   |
| AS+MO+W vs. MO+30P          | 2978 | 1742 | 1235   | 415 | 415 | 14.85  |
| AS+MO+W vs. MO+30Y          | 2978 | 1801 | 1177   | 415 | 415 | 14.15  |
| AS+MO+W vs. MO+30W          | 2978 | 1710 | 1268   | 415 | 415 | 15.24  |
| AS+MO vs. AS incubated      | 3300 | 1121 | 2179   | 415 | 415 | 26.2   |
| AS+MO vs. AS fresh          | 3300 | 399  | 2901   | 415 | 415 | 34.87  |
| AS+MO vs. MO                | 3300 | 1772 | 1528   | 415 | 415 | 18.37  |
| AS+MO vs. MO+30P            | 3300 | 1742 | 1557   | 415 | 415 | 18.72  |
| AS+MO vs. MO+30Y            | 3300 | 1801 | 1499   | 415 | 415 | 18.02  |
| AS+MO vs. MO+30W            | 3300 | 1710 | 1590   | 415 | 415 | 19.11  |
| AS incubated vs. AS fresh   | 1121 | 399  | 721.6  | 415 | 415 | 8.676  |
| AS incubated vs. MO         | 1121 | 1772 | -651.1 | 415 | 415 | 7.828  |
| AS incubated vs. MO+30P     | 1121 | 1742 | -621.8 | 415 | 415 | 7.476  |
| AS incubated vs. MO+30Y     | 1121 | 1801 | -680   | 415 | 415 | 8.176  |
| AS incubated vs. MO+30W     | 1121 | 1710 | -589.3 | 415 | 415 | 7.085  |
| AS fresh vs. MO             | 399  | 1772 | -1373  | 415 | 415 | 16.5   |
| AS fresh vs. MO+30P         | 399  | 1742 | -1343  | 415 | 415 | 16.15  |
| AS fresh vs. MO+30Y         | 399  | 1801 | -1402  | 415 | 415 | 16.85  |
| AS fresh vs. MO+30W         | 399  | 1710 | -1311  | 415 | 415 | 15.76  |
| MO vs. MO+30P               | 1772 | 1742 | 29.23  | 415 | 415 | 0.3515 |
| MO vs. MO+30Y               | 1772 | 1801 | -28.94 | 415 | 415 | 0.3479 |
| MO vs. MO+30W               | 1772 | 1710 | 61.77  | 415 | 415 | 0.7427 |
| MO+30P vs. MO+30Y           | 1742 | 1801 | -58.17 | 415 | 415 | 0.6994 |
| MO+30P vs. MO+30W           | 1742 | 1710 | 32.54  | 415 | 415 | 0.3912 |
| MO+30Y vs. MO+30W           | 1801 | 1710 | 90.71  | 415 | 415 | 1.091  |

241

### 242 7.3. Statistical analysis for fluorescence intensity spectral data of Thioflavin T assay

243 The Shapiro-Wilk test was performed to check for the normality of the groups.

|                                                  | AS +<br>MO<br>+<br>30P<br>Mean | AS +<br>MO<br>+<br>30Y<br>Mean | AS +<br>MO<br>+<br>30W<br>Mean | AS<br>+<br>MO<br>Mean | AS<br>Incu<br>bate<br>d<br>Mean | AS<br>Fres<br>h<br>Mean | MO<br>Mean | MO<br>+<br>30P<br>Mean | MO +<br>30Y<br>Mean | MO<br>+<br>30W<br>Mean | ThT<br>Mean |
|--------------------------------------------------|--------------------------------|--------------------------------|--------------------------------|-----------------------|---------------------------------|-------------------------|------------|------------------------|---------------------|------------------------|-------------|
| Test for<br>normal<br>distributi<br>on           |                                |                                |                                |                       |                                 |                         |            |                        |                     |                        |             |
| Shapiro-<br>Wilk test                            |                                |                                |                                |                       |                                 |                         |            |                        |                     |                        |             |
| W                                                | 0.91<br>19                     | 0.91<br>41                     | 0.917<br>6                     | 0.90<br>86            | 0.87<br>75                      | 0.90<br>83              | 0.93<br>56 | 0.93<br>08             | 0.932<br>6          | 0.92<br>64             | 0.9371      |
| P value                                          | 0.00<br>02                     | 0.00<br>02                     | 0.000<br>3                     | 0.00<br>01            | <0.0<br>001                     | 0.00<br>01              | 0.00<br>2  | 0.00<br>12             | 0.001<br>4          | 0.00<br>08             | 0.0023      |
| Passed<br>normality<br>test<br>(alpha=0.<br>05)? | No                             | No                             | No                             | No                    | No                              | No                      | No         | No                     | No                  | No                     | No          |
| P value<br>summary                               | ***                            | ***                            | ***                            | ***                   | ****                            | ***                     | **         | **                     | **                  | ***                    | **          |
| Number<br>of values                              | 66                             | 66                             | 66                             | 66                    | 66                              | 66                      | 66         | 66                     | 66                  | 66                     | 66          |

244 None of the groups followed normal distribution, thus a non-parametric ANOVA (Kruskal-  
245 Wallis) test was performed.

|                                            |             |
|--------------------------------------------|-------------|
| Kruskal-Wallis test                        |             |
| P value                                    | <0.0001     |
| Exact or approximate P value?              | Approximate |
| P value summary                            | ****        |
| Do the medians vary signif. (P<br>< 0.05)? | Yes         |
| Number of groups                           | 11          |
| Kruskal-Wallis statistic                   | 586.6       |
| Data summary                               |             |
| Number of treatments<br>(columns)          | 11          |
| Number of values (total)                   | 726         |

246 There was significant difference found between the groups, and thus group-wise comparisons  
247 were also performed and reported.

|                                  |      |
|----------------------------------|------|
| Number of families               | 1    |
| Number of comparisons per family | 55   |
| Alpha                            | 0.05 |

| Dunn's multiple comparisons test        | Mean rank diff. | Significant? | Summary | Adjusted P Value |     |
|-----------------------------------------|-----------------|--------------|---------|------------------|-----|
| AS + MO + 30PMean vs. AS + MO + 30YMean | 32.66           | No           | ns      | >0.9999          | A-B |
| AS + MO + 30PMean vs. AS + MO + 30WMean | 31.17           | No           | ns      | >0.9999          | A-C |
| AS + MO + 30PMean vs. AS + MOMean       | -78.51          | No           | ns      | >0.9999          | A-D |
| AS + MO + 30PMean vs. AS IncubatedMean  | -135            | Yes          | *       | 0.012            | A-E |
| AS + MO + 30PMean vs. AS FreshMean      | 360.3           | Yes          | ****    | <0.0001          | A-F |
| AS + MO + 30PMean vs. MOMean            | 344.9           | Yes          | ****    | <0.0001          | A-G |
| AS + MO + 30PMean vs. MO + 30PMean      | 357.3           | Yes          | ****    | <0.0001          | A-H |
| AS + MO + 30PMean vs. MO + 30YMean      | 198.2           | Yes          | ****    | <0.0001          | A-I |
| AS + MO + 30PMean vs. MO + 30WMean      | 273.5           | Yes          | ****    | <0.0001          | A-J |
| AS + MO + 30PMean vs. ThTMean           | 407.2           | Yes          | ****    | <0.0001          | A-K |
| AS + MO + 30YMean vs. AS + MO + 30WMean | -1.492          | No           | ns      | >0.9999          | B-C |
| AS + MO + 30YMean vs. AS + MOMean       | -111.2          | No           | ns      | 0.128            | B-D |
| AS + MO + 30YMean vs. AS IncubatedMean  | -167.6          | Yes          | ***     | 0.0002           | B-E |
| AS + MO + 30YMean vs. AS FreshMean      | 327.6           | Yes          | ****    | <0.0001          | B-F |
| AS + MO + 30YMean vs. MOMean            | 312.2           | Yes          | ****    | <0.0001          | B-G |
| AS + MO + 30YMean vs. MO + 30PMean      | 324.7           | Yes          | ****    | <0.0001          | B-H |
| AS + MO + 30YMean vs. MO + 30YMean      | 165.6           | Yes          | ***     | 0.0003           | B-I |
| AS + MO + 30YMean vs. MO + 30WMean      | 240.9           | Yes          | ****    | <0.0001          | B-J |
| AS + MO + 30YMean vs. ThTMean           | 374.5           | Yes          | ****    | <0.0001          | B-K |
| AS + MO + 30WMean vs. AS + MOMean       | -109.7          | No           | ns      | 0.1465           | C-D |
| AS + MO + 30WMean vs. AS IncubatedMean  | -166.1          | Yes          | ***     | 0.0003           | C-E |

|                                    |        |     |      |         |     |
|------------------------------------|--------|-----|------|---------|-----|
| AS + MO + 30WMean vs. AS FreshMean | 329.1  | Yes | **** | <0.0001 | C-F |
| AS + MO + 30WMean vs. MOMean       | 313.7  | Yes | **** | <0.0001 | C-G |
| AS + MO + 30WMean vs. MO + 30PMean | 326.2  | Yes | **** | <0.0001 | C-H |
| AS + MO + 30WMean vs. MO + 30YMean | 167.1  | Yes | ***  | 0.0003  | C-I |
| AS + MO + 30WMean vs. MO + 30WMean | 242.4  | Yes | **** | <0.0001 | C-J |
| AS + MO + 30WMean vs. ThTMean      | 376    | Yes | **** | <0.0001 | C-K |
| AS + MOMean vs. AS IncubatedMean   | -56.47 | No  | ns   | >0.9999 | D-E |
| AS + MOMean vs. AS FreshMean       | 438.8  | Yes | **** | <0.0001 | D-F |
| AS + MOMean vs. MOMean             | 423.4  | Yes | **** | <0.0001 | D-G |
| AS + MOMean vs. MO + 30PMean       | 435.8  | Yes | **** | <0.0001 | D-H |
| AS + MOMean vs. MO + 30YMean       | 276.7  | Yes | **** | <0.0001 | D-I |
| AS + MOMean vs. MO + 30WMean       | 352    | Yes | **** | <0.0001 | D-J |
| AS + MOMean vs. ThTMean            | 485.7  | Yes | **** | <0.0001 | D-K |
| AS IncubatedMean vs. AS FreshMean  | 495.2  | Yes | **** | <0.0001 | E-F |
| AS IncubatedMean vs. MOMean        | 479.8  | Yes | **** | <0.0001 | E-G |
| AS IncubatedMean vs. MO + 30PMean  | 492.3  | Yes | **** | <0.0001 | E-H |
| AS IncubatedMean vs. MO + 30YMean  | 333.2  | Yes | **** | <0.0001 | E-I |
| AS IncubatedMean vs. MO + 30WMean  | 408.5  | Yes | **** | <0.0001 | E-J |
| AS IncubatedMean vs. ThTMean       | 542.2  | Yes | **** | <0.0001 | E-K |
| AS FreshMean vs. MOMean            | -15.4  | No  | ns   | >0.9999 | F-G |
| AS FreshMean vs. MO + 30PMean      | -2.917 | No  | ns   | >0.9999 | F-H |
| AS FreshMean vs. MO + 30YMean      | -162   | Yes | ***  | 0.0005  | F-I |
| AS FreshMean vs. MO + 30WMean      | -86.72 | No  | ns   | 0.9642  | F-J |
| AS FreshMean vs. ThTMean           | 46.94  | No  | ns   | >0.9999 | F-K |
| MOMean vs. MO + 30PMean            | 12.48  | No  | ns   | >0.9999 | G-H |
| MOMean vs. MO + 30YMean            | -146.6 | Yes | **   | 0.0032  | G-I |
| MOMean vs. MO + 30WMean            | -71.32 | No  | ns   | >0.9999 | G-J |
| MOMean vs. ThTMean                 | 62.34  | No  | ns   | >0.9999 | G-K |
| MO + 30PMean vs. MO + 30YMean      | -159.1 | Yes | ***  | 0.0007  | H-I |

|                               |       |     |      |         |     |
|-------------------------------|-------|-----|------|---------|-----|
| MO + 30PMean vs. MO + 30WMean | -83.8 | No  | ns   | >0.9999 | H-J |
| MO + 30PMean vs. ThTMean      | 49.86 | No  | ns   | >0.9999 | H-K |
| MO + 30YMean vs. MO + 30WMean | 75.32 | No  | ns   | >0.9999 | I-J |
| MO + 30YMean vs. ThTMean      | 209   | Yes | **** | <0.0001 | I-K |
| MO + 30WMean vs. ThTMean      | 133.7 | Yes | *    | 0.0138  | J-K |

249

| Test details                            | Mean rank<br>1 | Mean rank<br>2 | Mean<br>rank<br>diff. | n1 | n2 | Z       |
|-----------------------------------------|----------------|----------------|-----------------------|----|----|---------|
| AS + MO + 30PMean vs. AS + MO + 30YMean | 526.4          | 493.7          | 32.66                 | 66 | 66 | 0.8946  |
| AS + MO + 30PMean vs. AS + MO + 30WMean | 526.4          | 495.2          | 31.17                 | 66 | 66 | 0.8537  |
| AS + MO + 30PMean vs. AS + MOMean       | 526.4          | 604.9          | -78.51                | 66 | 66 | 2.15    |
| AS + MO + 30PMean vs. AS IncubatedMean  | 526.4          | 661.4          | -135                  | 66 | 66 | 3.697   |
| AS + MO + 30PMean vs. AS FreshMean      | 526.4          | 166.1          | 360.3                 | 66 | 66 | 9.868   |
| AS + MO + 30PMean vs. MOMean            | 526.4          | 181.5          | 344.9                 | 66 | 66 | 9.446   |
| AS + MO + 30PMean vs. MO + 30PMean      | 526.4          | 169            | 357.3                 | 66 | 66 | 9.788   |
| AS + MO + 30PMean vs. MO + 30YMean      | 526.4          | 328.2          | 198.2                 | 66 | 66 | 5.429   |
| AS + MO + 30PMean vs. MO + 30WMean      | 526.4          | 252.8          | 273.5                 | 66 | 66 | 7.493   |
| AS + MO + 30PMean vs. ThTMean           | 526.4          | 119.2          | 407.2                 | 66 | 66 | 11.15   |
| AS + MO + 30YMean vs. AS + MO + 30WMean | 493.7          | 495.2          | -1.492                | 66 | 66 | 0.04088 |
| AS + MO + 30YMean vs. AS + MOMean       | 493.7          | 604.9          | -111.2                | 66 | 66 | 3.045   |
| AS + MO + 30YMean vs. AS IncubatedMean  | 493.7          | 661.4          | -167.6                | 66 | 66 | 4.592   |
| AS + MO + 30YMean vs. AS FreshMean      | 493.7          | 166.1          | 327.6                 | 66 | 66 | 8.973   |
| AS + MO + 30YMean vs. MOMean            | 493.7          | 181.5          | 312.2                 | 66 | 66 | 8.551   |
| AS + MO + 30YMean vs. MO + 30PMean      | 493.7          | 169            | 324.7                 | 66 | 66 | 8.893   |
| AS + MO + 30YMean vs. MO + 30YMean      | 493.7          | 328.2          | 165.6                 | 66 | 66 | 4.535   |
| AS + MO + 30YMean vs. MO + 30WMean      | 493.7          | 252.8          | 240.9                 | 66 | 66 | 6.598   |
| AS + MO + 30YMean vs.                   | 493.7          | 119.2          | 374.5                 | 66 | 66 | 10.26   |

|                                        |       |       |        |    |    |         |
|----------------------------------------|-------|-------|--------|----|----|---------|
| ThTMean                                |       |       |        |    |    |         |
| AS + MO + 30WMean vs. AS + MOMean      | 495.2 | 604.9 | -109.7 | 66 | 66 | 3.004   |
| AS + MO + 30WMean vs. AS IncubatedMean | 495.2 | 661.4 | -166.1 | 66 | 66 | 4.551   |
| AS + MO + 30WMean vs. AS FreshMean     | 495.2 | 166.1 | 329.1  | 66 | 66 | 9.014   |
| AS + MO + 30WMean vs. MOMean           | 495.2 | 181.5 | 313.7  | 66 | 66 | 8.592   |
| AS + MO + 30WMean vs. MO + 30PMean     | 495.2 | 169   | 326.2  | 66 | 66 | 8.934   |
| AS + MO + 30WMean vs. MO + 30YMean     | 495.2 | 328.2 | 167.1  | 66 | 66 | 4.576   |
| AS + MO + 30WMean vs. MO + 30WMean     | 495.2 | 252.8 | 242.4  | 66 | 66 | 6.639   |
| AS + MO + 30WMean vs. ThTMean          | 495.2 | 119.2 | 376    | 66 | 66 | 10.3    |
| AS + MOMean vs. AS IncubatedMean       | 604.9 | 661.4 | -56.47 | 66 | 66 | 1.547   |
| AS + MOMean vs. AS FreshMean           | 604.9 | 166.1 | 438.8  | 66 | 66 | 12.02   |
| AS + MOMean vs. MOMean                 | 604.9 | 181.5 | 423.4  | 66 | 66 | 11.6    |
| AS + MOMean vs. MO + 30PMean           | 604.9 | 169   | 435.8  | 66 | 66 | 11.94   |
| AS + MOMean vs. MO + 30YMean           | 604.9 | 328.2 | 276.7  | 66 | 66 | 7.58    |
| AS + MOMean vs. MO + 30WMean           | 604.9 | 252.8 | 352    | 66 | 66 | 9.643   |
| AS + MOMean vs. ThTMean                | 604.9 | 119.2 | 485.7  | 66 | 66 | 13.3    |
| AS IncubatedMean vs. AS FreshMean      | 661.4 | 166.1 | 495.2  | 66 | 66 | 13.57   |
| AS IncubatedMean vs. MOMean            | 661.4 | 181.5 | 479.8  | 66 | 66 | 13.14   |
| AS IncubatedMean vs. MO + 30PMean      | 661.4 | 169   | 492.3  | 66 | 66 | 13.49   |
| AS IncubatedMean vs. MO + 30YMean      | 661.4 | 328.2 | 333.2  | 66 | 66 | 9.127   |
| AS IncubatedMean vs. MO + 30WMean      | 661.4 | 252.8 | 408.5  | 66 | 66 | 11.19   |
| AS IncubatedMean vs. ThTMean           | 661.4 | 119.2 | 542.2  | 66 | 66 | 14.85   |
| AS FreshMean vs. MOMean                | 166.1 | 181.5 | -15.4  | 66 | 66 | 0.4219  |
| AS FreshMean vs. MO + 30PMean          | 166.1 | 169   | -2.917 | 66 | 66 | 0.07989 |
| AS FreshMean vs. MO + 30YMean          | 166.1 | 328.2 | -162   | 66 | 66 | 4.438   |
| AS FreshMean vs. MO + 30WMean          | 166.1 | 252.8 | -86.72 | 66 | 66 | 2.375   |
| AS FreshMean vs. ThTMean               | 166.1 | 119.2 | 46.94  | 66 | 66 | 1.286   |
| MOMean vs. MO + 30PMean                | 181.5 | 169   | 12.48  | 66 | 66 | 0.342   |
| MOMean vs. MO + 30YMean                | 181.5 | 328.2 | -146.6 | 66 | 66 | 4.017   |
| MOMean vs. MO + 30WMean                | 181.5 | 252.8 | -71.32 | 66 | 66 | 1.953   |

|                               |       |       |        |    |    |       |
|-------------------------------|-------|-------|--------|----|----|-------|
| MOMean vs. ThTMean            | 181.5 | 119.2 | 62.34  | 66 | 66 | 1.708 |
| MO + 30PMean vs. MO + 30YMean | 169   | 328.2 | -159.1 | 66 | 66 | 4.359 |
| MO + 30PMean vs. MO + 30WMean | 169   | 252.8 | -83.8  | 66 | 66 | 2.295 |
| MO + 30PMean vs. ThTMean      | 169   | 119.2 | 49.86  | 66 | 66 | 1.366 |
| MO + 30YMean vs. MO + 30WMean | 328.2 | 252.8 | 75.32  | 66 | 66 | 2.063 |
| MO + 30YMean vs. ThTMean      | 328.2 | 119.2 | 209    | 66 | 66 | 5.724 |
| MO + 30WMean vs. ThTMean      | 252.8 | 119.2 | 133.7  | 66 | 66 | 3.661 |

250

## 251 7. References

- 252 1. Narhi, L., Wood, S. J., Steavenson, S., Jiang, Y., Wu, G. M., Anafi, D., & Citron, M. . *Journal of*  
253 *Biological Chemistry* **1999**, 274, (14), 9843-9846.
- 254 2. Arakha, M., Roy, J., Nayak, P. S., Mallick, B., & Jha, S. *Free Radical Biology and Medicine*  
255 **2017**, 110, 42-53.
- 256 3. Yadav, K. K., Ojha, M., Pariary, R., Arakha, M., Bhunia, A., & Jha, S. *Biochimie* **2022**, 193, 64-  
257 77.
- 258 4. Asthana, S., Hazarika, Z., Nayak, P. S., Roy, J., Jha, A. N., Mallick, B., & Jha, S. *Biochimica et*  
259 *Biophysica Acta (BBA) - General Subjects* **2019**, 1863, (1), 153-166.
- 260 5. Damian, L. *Methods and Applications* **2013**, 1008, 103-18.
- 261 6. Basu, P., Payghan, P. V., Ghoshal, N., & Kumar, G. S. *Journal of Photochemistry and*  
262 *Photobiology B: Biology* **2016**, 161, 335-344.

263
